# Structural rearrangement of the intracellular gate of the serotonin transporter induced by Thr276 phosphorylation

Matthew C. Chan,<sup>†</sup> Erik Procko,<sup>‡,¶,§,||</sup> and Diwakar Shukla<sup>\*,†,¶,||,⊥,#,©</sup>

<sup>†</sup>*Department of Chemical and Biomolecular Engineering, University of Illinois at  
Urbana-Champaign, Urbana, IL, 61801*

<sup>‡</sup>*Department of Biochemistry, University of Illinois at Urbana-Champaign, Urbana, IL,  
61801*

<sup>¶</sup>*Center for Biophysics and Quantitative Biology, University of Illinois at  
Urbana-Champaign, Urbana, IL, 61801*

<sup>§</sup>*Neuroscience Program, University of Illinois at Urbana-Champaign, Urbana, IL, 61801*

<sup>||</sup>*Cancer Center at Illinois, University of Illinois at Urbana-Champaign, Urbana, IL, 61801*

<sup>⊥</sup>*National Center for Supercomputing Applications, University of Illinois, Urbana, IL,  
61801*

<sup>#</sup>*Beckman Institute for Advanced Science and Technology, University of Illinois at  
Urbana-Champaign, Urbana, IL, 61801*

<sup>©</sup>*NIH Center for Macromolecular Modeling and Bioinformatics, University of Illinois at  
Urbana-Champaign, Urbana, IL, 61801*

E-mail: diwakar@illinois.edu

**Abstract**

The reuptake of the neurotransmitter serotonin from the synaptic cleft by the serotonin transporter, SERT, is essential for proper neurological signaling. Biochemical studies have shown Thr276 of transmembrane helix 5 is a site of PKG-mediated SERT phosphorylation, which has been proposed to shift the SERT conformational equilibria to promote inward-facing states, thus enhancing 5HT transport. Recent structural and simulation studies have provided insights into the conformation transitions during substrate transport but have not shed light on SERT regulation via post-translational modifications. Using molecular dynamics simulations and Markov state models, we investigate how Thr276 phosphorylation impacts the SERT mechanism and its role in enhancing transporter stability and function. Our simulations show that Thr276 phosphorylation alters the hydrogen-bonding network involving residues on transmembrane helix 5. This in turn decreases the free energy barriers for SERT to transition to the inward-facing state, thus facilitating 5HT transport. The results provide atomistic insights into *in vivo* SERT regulation and can be extended to other pharmacologically important transporters in the solute carrier superfamily.

## Keywords

serotonin transporter, phosphorylation, molecular dynamics, Markov state models

## 1 Introduction

1 The serotonin transporter (SERT, SLC6A4) is responsible for the reuptake of synaptic sero-  
2 tonin (5-hydroxytryptamine, 5HT) from the synapse thereby regulating serotonergic signal-  
3 ing in the brain and elsewhere in the body. SERT, as well as the dopamine transporter  
4 (DAT) and norephepine transporter (NET), are members of the sodium-coupled, chloride-  
5 dependent monoamine transporters in the neurotransmitter:sodium symporters (NSS) fam-  
6 ily and the solute carrier (SLC) superfamily (1). Members of this family adopt an inverted  
7 psudeo-symmetrical architecture consisting of 12 transmembrane (TM) helices commonly

8 known as the LeuT fold(1, 2) (Figure 1A). Transport of neurotransmitters across the neu-  
9 ronal membrane via the NSS family is facilitated by an alternating access mechanism in which  
10 these transporters then undergo a series of conformational transitions from an outward-facing  
11 (OF) state, where the binding cavity is accessible from the extracellular side, to an occluded  
12 (OC) state, and finally an inward-facing (IF) state where the substrates are released into  
13 the neuron (Figure 1) (3). Reverting back to the outward-facing state involves the efflux of  
14 potassium ions in some NSS transporters (4).

15 In the body, SERT is regulated thorough numerous phosphorylation mechanisms that  
16 involve protein kinases, phosphatases, receptors, and substrates with implications for trans-  
17 porter expression, stability, trafficking, oligermization, and uptake activity (5–7). Conse-  
18 quently, improper regulation of transporter function is associated with various physiological  
19 complications and psychiatric disorders (8–11). Increased phosphorylation of SERT by pro-  
20 tein kinase C-linked pathways is linked with increased SERT internalization and decreased  
21 5HT-transport activity (12, 13). Upregulation of SERT by protein kinase G (PKG) en-  
22 hances expression and transport activity (14). The psycho-stimulant drug amphetamine  
23 increases SERT phosphorylation (13) and in DAT, amphetamine-induced phosphorylation  
24 of N-terminal residues exhibits a dopamine efflux function (15, 16). Among other trans-  
25 porters in the SLC superfamily, phosphorylation heavily influences transporter function, and  
26 thus is a universal mechanism of regulating transporter activity (17–20).

27 From a thermodynamics perspective, post-translational modifications (e.g. phospho-  
28 rylation, glycosylation, lipidation, protonation) may alter the conformational free energy  
29 landscape, thus affecting protein stability and/or dynamics (21, 22). The use of molecular  
30 dynamics (MD) simulations not only provide an atomistic perspective of complex protein  
31 dynamics, but upon sufficient sampling, may allow us to quantify the thermodynamics of  
32 functional states and key transition barriers. For example, serine/threonine phosphorylation  
33 of protein kinases promotes active-like conformations by stabilizing the dynamics of flexible  
34 loops (23–25). Alternatively, phosphorylation(24) and s-glutathionylation(26) of the plant

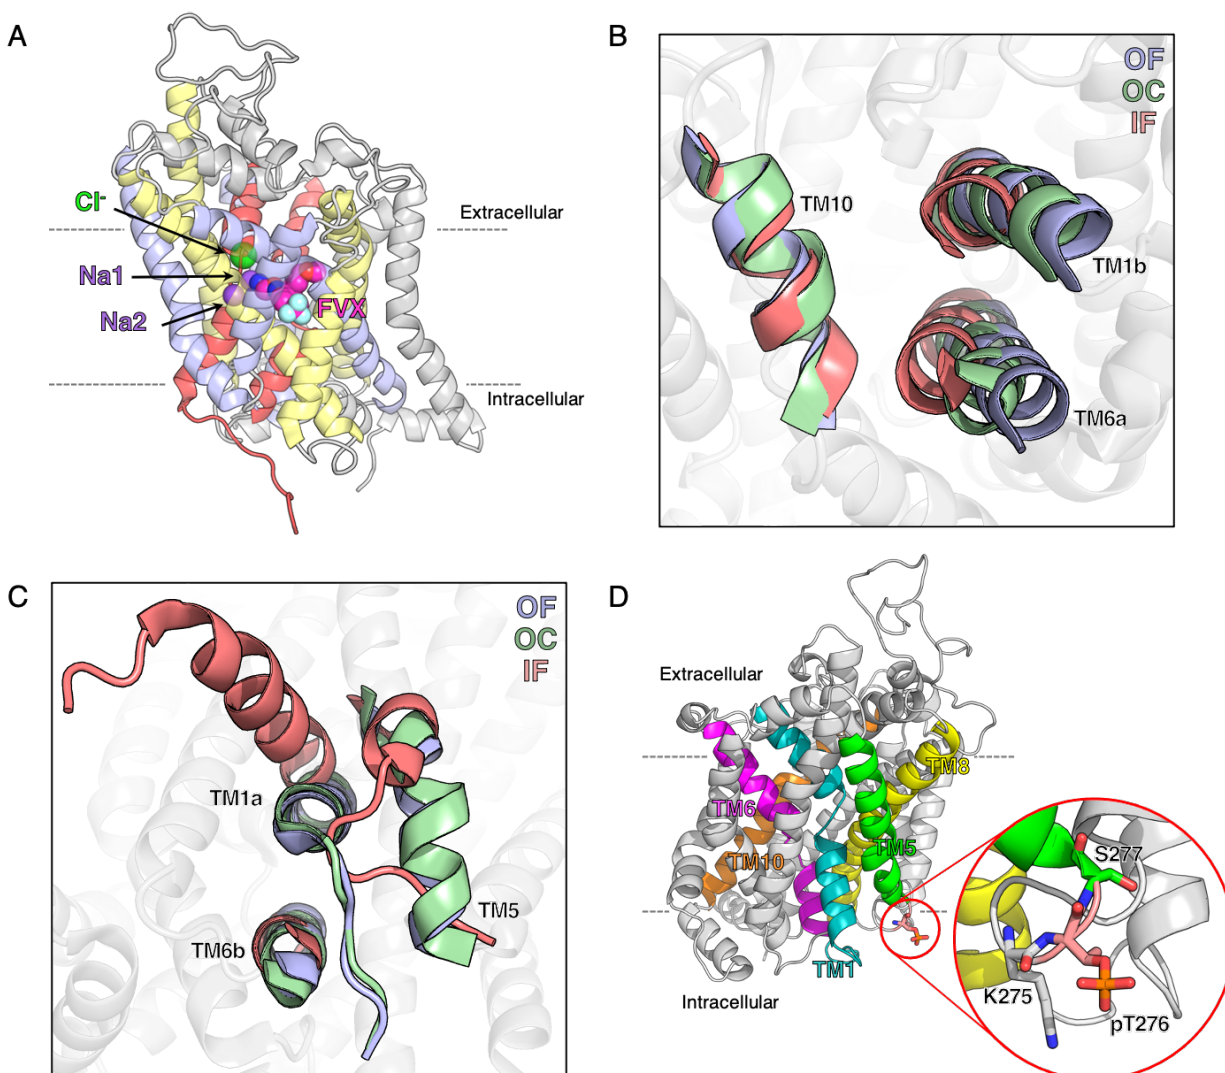

Figure 1: Architecture of the serotonin transporter, SERT. (A) Crystal structure of SERT complexed with inhibitor molecule fluvoxamine resolved in the outward facing conformation (PDB: 6AWP). The sodium and chloride ions resolved in the crystal structure are shown as purple and green spheres, respectively. Fluvoxamine (FVX) bound in the orthosteric site shown in magenta spheres. The two fold architecture of SERT is colored as follows: TM1 and TM6 in red, TM2-5 in light blue, TM7-10 in yellow, TM11-12 in gray. (B, C) SERT viewed from the extracellular plane (B) and intracellular plane (C) showing the conformational transitions of the gating helices involved in the transport process. The cryo-EM structures of SERT resolved in three states (OF (PDB:6DZY): blue, OC (PDB:6DZV): green, IF (PDB:6DZZ): salmon) are overlaid on the SERT-OF structure (gray). (D) The Thr276 phosphorylation site on TM5 is shown as salmon colored sticks. The SERT structure is represented as cartoon with TM 1, 5, 6, 8, and 10 colored in teal, green, magenta, yellow, and orange, respectively.



35 kinase BAK1 alter the free energies where inactive states are favored over active-like states.  
36 Tyrosine nitration of an abscisic acid plant hormone receptor increases the free energy bar-  
37 riers for ligand binding, thereby preventing receptor activation (27). As a final example,  
38 glycosylation of SH3 domains promote their folded states due to the presence of bulky side  
39 chains that destabilize unfolded states (28). Therefore, relating how post-translational mod-  
40 ifications affect the protein dynamics and conformational free energy landscape is necessary  
41 to understand how protein function is regulated.

42 In 2007, Ramamoorthy *et al.* identified Thr276 of TM5 to be a site of PKG-mediated  
43 SERT phosphorylation (Figure 1D). These observations uncovered essential insights into  
44 the *in vivo* regulatory mechanisms of SERT trafficking and transport function via post-  
45 translational modification (29). It was later characterized by Zhang *et al.*, through the  
46 binding of conformational selective inhibitors cocaine and ibogaine, that Thr276 phospho-  
47 rylation directly modulates the conformational equilibria of functional states to enhance  
48 5HT-transport (30). Quantum dot studies conducted by Bailey *et al.* further correlated  
49 Thr276 phosphorylation with cholesterol depletion in midbrain neurons (31). We have pre-  
50 viously conducted large-scale MD simulations to characterize the serotonin import process  
51 in SERT. We showed how 5HT binding in the orthosteric site reduces the free energy barri-  
52 ers for transition from the outward-facing to inward-facing states, while also stabilizing the  
53 inward-facing state to promote substrate import (32, 33). In this current study, we aim to  
54 understand the molecular mechanism of Thr276 phosphorylation and its structural conse-  
55 quences on the conformational heterogeneity of SERT. We first performed MD simulations  
56 of SERT bound with inhibitors to provide atomistic details of Zhang *et al.*'s observations  
57 (30). Next, using our previously collected SERT data as a comparison(32), we characterized  
58 the dynamics and structural stability of phosphorylated Thr276 SERT using Markov state  
59 models. To this extent, we collected over 600 microseconds of MD simulations data using  
60 the distributive computing platform Folding@Home (34) of phosphorylated Thr276 SERT.  
61 Our results show that Thr276 phosphorylation modulates SERT dynamics primarily through

62 the rearrangement of intracellular hydrogen bonding interactions. Consequently, the altered  
63 dynamics of the intracellular gating helices reduces the free energy barriers between occluded  
64 and inward-facing states and further stabilizes SERT in the inward-facing state for substrate  
65 release into the cell.

## 66 **2 Results and discussion**

### 67 **2.1 Accessibility of the Thr276 phosphorylation site under in-** 68 **hibitor binding**

69 Structural and computational studies on SERT have revealed that structural transitions from  
70 the outward-facing state to the inward-facing state of SERT are initiated by the binding of  
71 substrates in the orthosteric pocket which triggers the movement of extracellular gating he-  
72 lices TM1a and TM6b towards the helical scaffold (32, 35, 36) (Figure 1B). The closure  
73 of the extracellular vestibule stabilizes the transporter to allow for solvation of the intra-  
74 cellular exit path and the formation of the inward-facing state. The conformation of the  
75 inward-facing state is notably associated with the outward motion of TM1a from the helical  
76 bundle and unwinding of the cytoplasmic base of TM5 to promote a solvent exposed intra-  
77 cellular vestibule for substrate release (36–39) (Figure 1C). Multiple studies conducted by  
78 the Rudnick group investigated the reactivity of substituted cysteine residues with MTSEA  
79 (2-(aminoethyl)methanethiosulfonate hydrobromide) as a measure of SERT accessibility and  
80 conformational transitions (30, 37, 40–43). Of these studies, in 2016, Zhang *et al.* used  
81 cocaine and ibogaine to influence the conformational equilibria of outward-facing and inward-  
82 facing states and investigated the effects of Thr276 phosphorylation on the conformational  
83 dynamics and substrate transport mechanism(30). They have identified PKG-mediated  
84 phosphorylation of Thr276 to occur more readily when SERT is bound with ibogaine as  
85 compared to cocaine. As ibogaine stabilizes SERT in an inward-facing state, this allows  
86 for TM5 to unwind and promote Thr276 phosphorylation. The cryo-EM structure of SERT

87 bound with ibogaine would later be resolved to depict the unfolded structure of TM5 (36).

88 To provide an atomistic perspective of Zhang *et al.*'s observations, we performed MD  
89 simulations of SERT bound with inhibitors at the orthosteric site. Cocaine docked in an  
90 outward-facing SERT crystal structure (PDB: 6AWO) or the ibogaine-complexed inward-  
91 facing cryo-EM SERT structure (PDB: 6DZZ) were used as the starting structures for sim-  
92 ulations (Figure 2B, 2C). The proteins were embedded in a 1-palmitoyl-2-oleoyl-sn-glycero-  
93 3-phosphocholine (POPC) lipid bilayer and solvated with 150mM NaCl. Five independent  
94 100 ns long simulations for each SERT-inhibitor complex were performed.

95 The simulations show distinct structural characteristics of the respective SERT-inhibitor  
96 complex. As expected, the fluctuations of TM1a in the intracellular vestibule are greater  
97 when SERT is in the ibogaine-bound inward-facing state versus the cocaine-bound outward-  
98 facing state (Figure 2). Additionally, the fluctuations of extracellular loop (EL) 2 are more  
99 pronounced in simulations of the SERT-cocaine complex. This observation was also noted  
100 in our previous study illustrating the coupled dynamics of EL2 and the opening and closure  
101 of the extracellular vestibule (32). Most importantly, unwinding of the cytoplasmic base of  
102 TM5 in ibogaine-bound SERT promotes greater dynamics of the entire helix and intracellular  
103 loop (IL) 2.

104 Solvent accessible surface area (SASA) measurements show increased solvent exposure of  
105 Thr276 in ibogaine-bound SERT simulations as compared to cocaine-bound SERT (Figure  
106 3A). In the inward-facing SERT-ibogaine structure, the outward tilt of TM1a enables Tyr95  
107 to interact with the backbone carbonyl of Thr276 while Tyr350 hydrogen bonds with Gly273.  
108 These interactions initially stabilize the unfolded TM5, but after  $\sim 20$  ns, the hydrogen  
109 bonding interactions break and the unfolded TM5 region becomes exposed to the intracellular  
110 solvent. Afterwards, Thr276 remains exposed to the solvent, with an average SASA of  $82$   
111  $\pm 12 \text{ \AA}^2$  as compared to  $26 \pm 11 \text{ \AA}^2$  in SERT-cocaine simulations. Furthermore, these  
112 observations are consistent with SASA calculations from our previous simulations with the  
113 endogenous substrate 5HT (Figure 3B) (32). The binding of 5HT enables similar transition

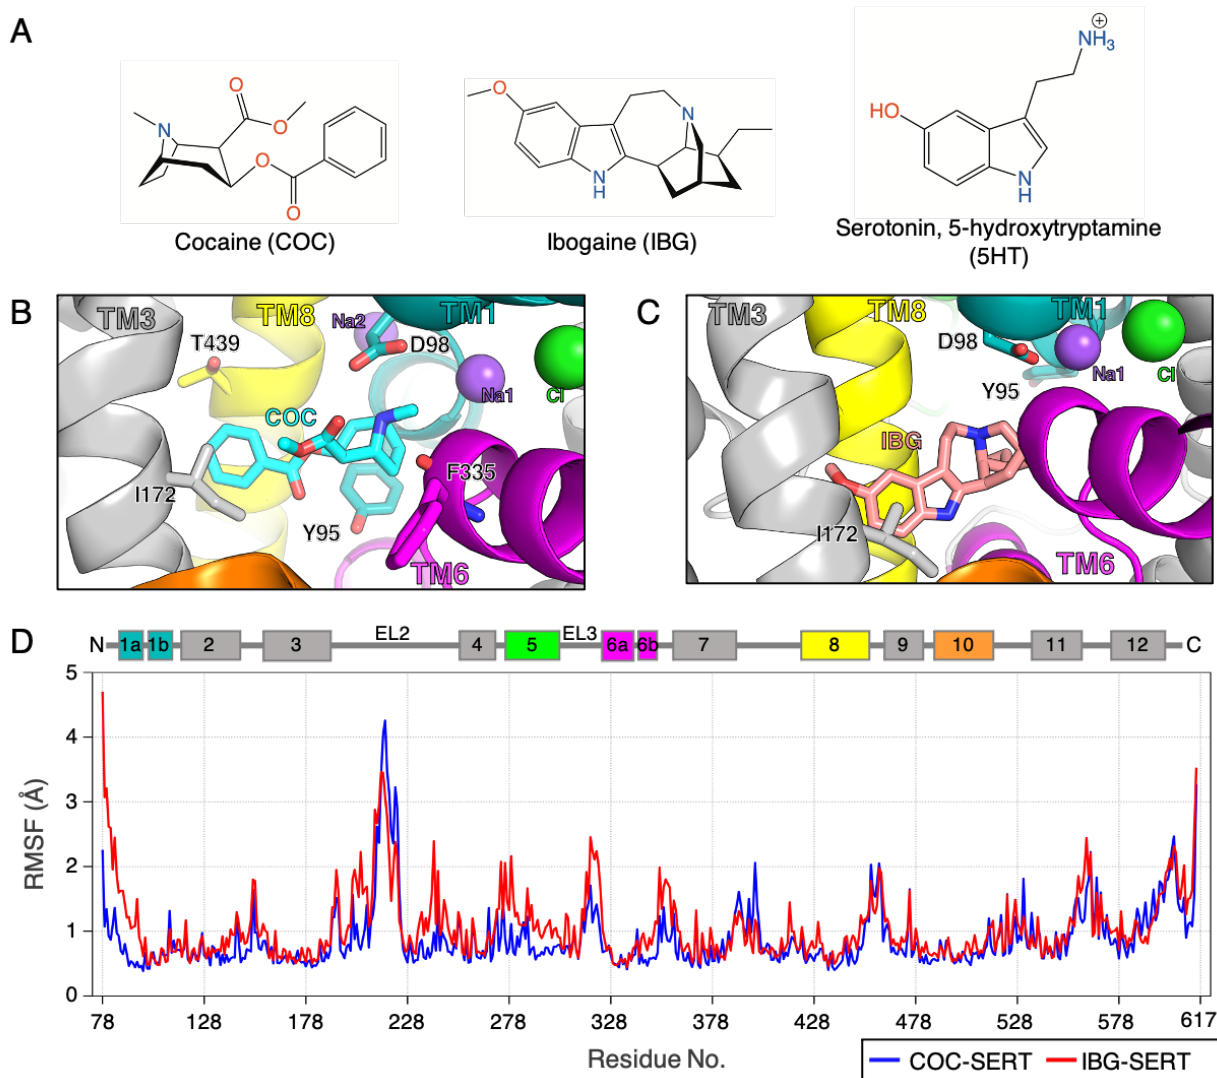

Figure 2: Dynamics of inhibitor-bound SERT. (A) Chemical structures for the conformational selective inhibitors cocaine and ibogaine and the endogenous substrate serotonin (5HT). (B, C) MD snapshots of cocaine (B) and ibogaine (C) bound in the orthosteric site. TM helices 1, 5, 6, 8, and 10 colored in teal, green, magenta, yellow, and orange respectively. (D) Root-mean-square fluctuation (RMSF) of ibogaine-bound SERT (red; in the IF state) and cocaine-bound SERT (blue; in the OF state). The calculated RMSF was averaged over five independent 100 ns simulations.

114 to the inward-facing state where unwinding of TM5 further allows Thr276 to be exposed to  
115 the cytoplasm. Overall, our observations of the accessibility of the Thr276 phosphorylation  
116 site is consistent with the findings presented by Zhang *et al.*

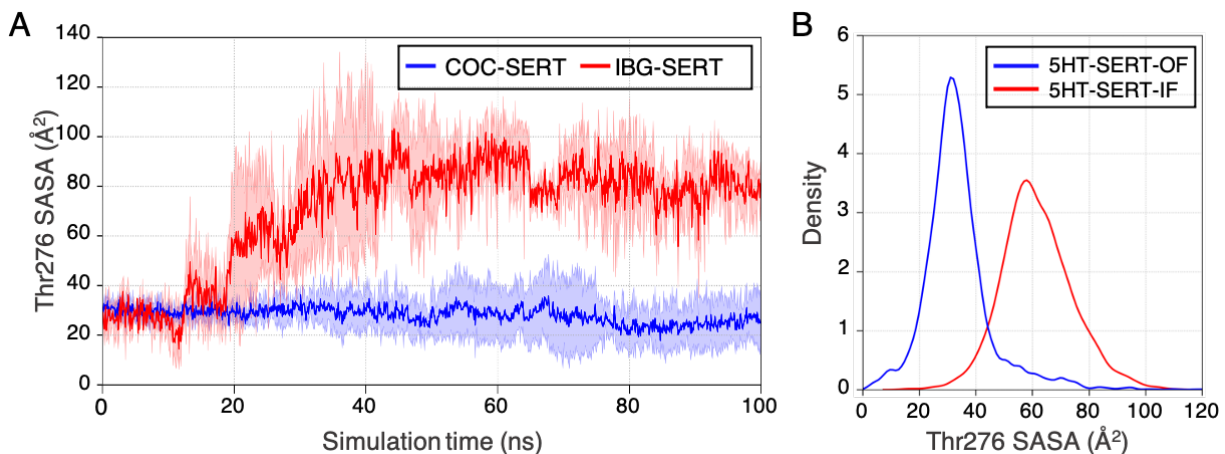

Figure 3: Accessibility of Thr276. (A) Calculated solvent accessible surface area (SASA) of Thr276 for SERT-ibogaine (red) and SERT-cocaine (blue). The calculated SASA was averaged over five independent 100 ns simulations. (B) Density distribution of Thr276 SASA from outward- and inward-facing states from SERT-5HT import simulations (32).

## 117 2.2 Phosphorylation of Thr276 alters the conformational free energy landscape

118

119 By projecting the electrostatic potential of the three-dimensional structure of SERT, we observed that phosphorylation of Thr276 affects the intracellular gate and neighboring residues (Figure S1). When closed, there is a positive surface charge at the intracellular gates of dephosphorylated SERT (dphos-SERT). When Thr276 is phosphorylated, residues surrounding the phosphorylation site become neutralized, thereby potentially altering the dynamics of the intracellular gate during occluded to inward-facing transitions. Given the proximity of Thr276 to the intracellular gating domain, we sought to understand how phosphorylation affects the intrinsic dynamics using MD simulations of phosphorylated Thr276 SERT

120  
121  
122  
123  
124  
125  
126



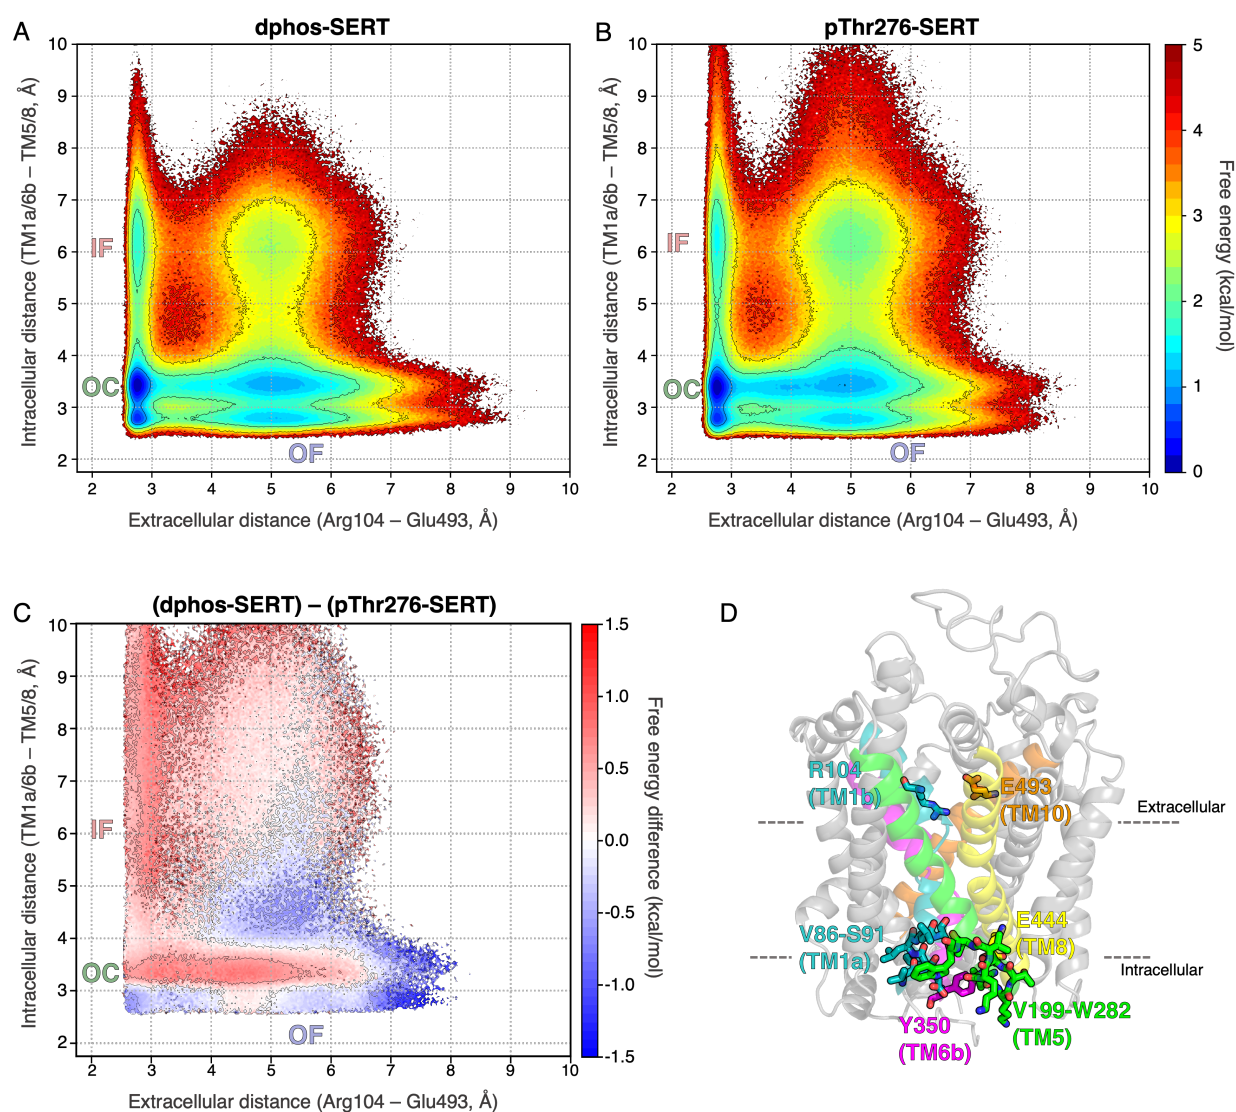

Figure 4: Phosphorylation of Thr276 alters the SERT conformational free energy landscape. (A, B) Conformational free energy landscapes for dphos-SERT (A) and pThr276-SERT (B) projected on the coordinates defined by the extracellular and intracellular gating distances. Simulation data were reweighted by the Markov state model equilibrium probabilities. (C) Difference between the of free energy landscapes of dphos-SERT and pThr276-SERT projected on the same coordinates of the gating distances. (D) Metrics used for the projection of the free energy landscapes. Conformations in red have relatively lower free energy in pThr276-SERT. Extracellular gating distances were defined as the closest heavy atom between Arg104 and Glu493. Intracellular gating distances were calculated between residues of TM1a/TM6b and TM5/TM8.



127 (pThr276-SERT). To efficiently explore the conformational landscape, we seeded 2,520 inde-  
128 pendent pThr276-SERT simulations to be conducted on Folding@Home (34). The starting  
129 structures were selected from a Markov state model (MSM)-weighted distribution of 18  
130 macrostates of the dphos-SERT obtained from our previous study (32). An aggregated total  
131 of  $\sim 630 \mu\text{s}$  of simulation data were collected and used to construct a MSM (see Methods for  
132 details).

133 Projection of the MSM-weighted simulation data on the axes defined by the extracellular  
134 and intracellular gating residues quantifies the relative stability of SERT conformational  
135 states (Figure 4). In dphos-SERT simulations, transitions from the occluded state to inward-  
136 facing state were rate limiting for substrate import, with free energy barriers of  $\sim 2$  kcal/mol  
137 (Figure 4A) (32). Additionally, as compared to outward-facing and occluded states, the  
138 formation of inward-facing states in dphos-SERT are relatively less stable. The modification  
139 of Thr276 to phosphothreonine exhibits shifts in the free energy barriers of the conformational  
140 landscape. Transitions from outward-facing to occluded states retain relatively low free  
141 energy barriers. While outward-facing and occluded states remain stable with a relative free  
142 energy of  $\sim 0-1$  kcal/mol, the inward-facing state is further stabilized by  $\sim 0.5-1$  kcal/mol  
143 (Figure 4B). The transitions from occluded to inward-facing are further reduced by  $\sim 0.5$   
144 kcal/mol as compared to dphos-SERT (Figure 4C), in agreement with the 25% increase in  
145 5HT uptake as experimentally characterized by Zhang *et al.* (30).

### 146 **2.3 Rearrangement of the intracellular hydrogen-bonding network**

147 The intracellular gate of SERT is comprised of a number of charged residues on TM1a,  
148 TM5, TM6b, and TM8 that form a hydrogen bonding network to stabilize the transporter  
149 in outward-facing and occluded states (Figure 5A). These residues are conserved among  
150 other monoamine transporters as well as the NSS family. Several studies have highlighted the  
151 importance of the intracellular region in the NSS family and its role in the gating mechanism  
152 (32, 36, 44–46). The binding of the substrates in the orthosteric site closes the extracellular

153 vestibule thereby initiating the breakage of these electrostatic interactions and promoting  
154 transitions to the inward-facing state where an intracellular exit pathway is formed between  
155 TM1a and TM5 (Figure 5B).

156 MD simulations of pThr276-SERT shows that most of the intracellular interactions are  
157 formed but with slight deviations of the distance distributions as compared to the dphos-  
158 SERT simulations (Figure 5C, 5D). We observed that the phosphorylation of Thr276 disrupts  
159 the hydrogen bonding interactions of residues on TM5, most notably Lys275, Lys279, and  
160 Trp282. The interactions are critical in stabilizing TM5 with TM1a while the intracellular  
161 gate is closed. When comparing the occluded structures from simulations, the distances for  
162 pThr276-SERT intracellular residue pairs exhibit a broader distribution suggesting overall  
163 weaker interactions. For the Asp80-Lys275 pair, the distance between these residues in-  
164 creases in pThr276-SERT simulations, especially when in inward-facing states (Figure 5D,  
165 S2). The electrostatic interactions Arg79-Asp452, Glu78-Arg462, and Glu78-Lys275 are  
166 more prevalent in pThr276-SERT as compared to dphos-SERT (Figure S2). Given the in-  
167 creased flexibility of the N-terminal tail, residues on the N-terminus may compensate for  
168 weaker interactions of TM1a and TM5 when Thr276 is phosphorylated and retain stable  
169 outward-facing and occluded states for substrate binding.

170 The helical structure of TM5 is regulated by the hydrogen bonding interactions between  
171 the side chains of Thr276 and Ser277 with the backbone carbonyl of Ser269 on TM4 (Fig-  
172 ure 6A). Upon conformational transitions to the inward-facing state, these interactions are  
173 severed resulting in the unwinding of the cytoplasmic base of TM5. The addition of the  
174 phosphate to Thr276 not only presents a negative surface charge but also prevents Thr276  
175 from being the hydrogen bond donor. Projection of the simulation data on the coordinates  
176 defined by the distance of the Thr276 side chain with the backbone carbonyl of Ser269  
177 verses the average helical content of TM5 shows that this interaction is not maintained  
178 in pThr276-SERT and allows for greater unfolding of TM5 (Figure 6B). The side chain of  
179 Ser277 makes alternate interactions with Ser269 and Glu444 in dphos-SERT simulations.

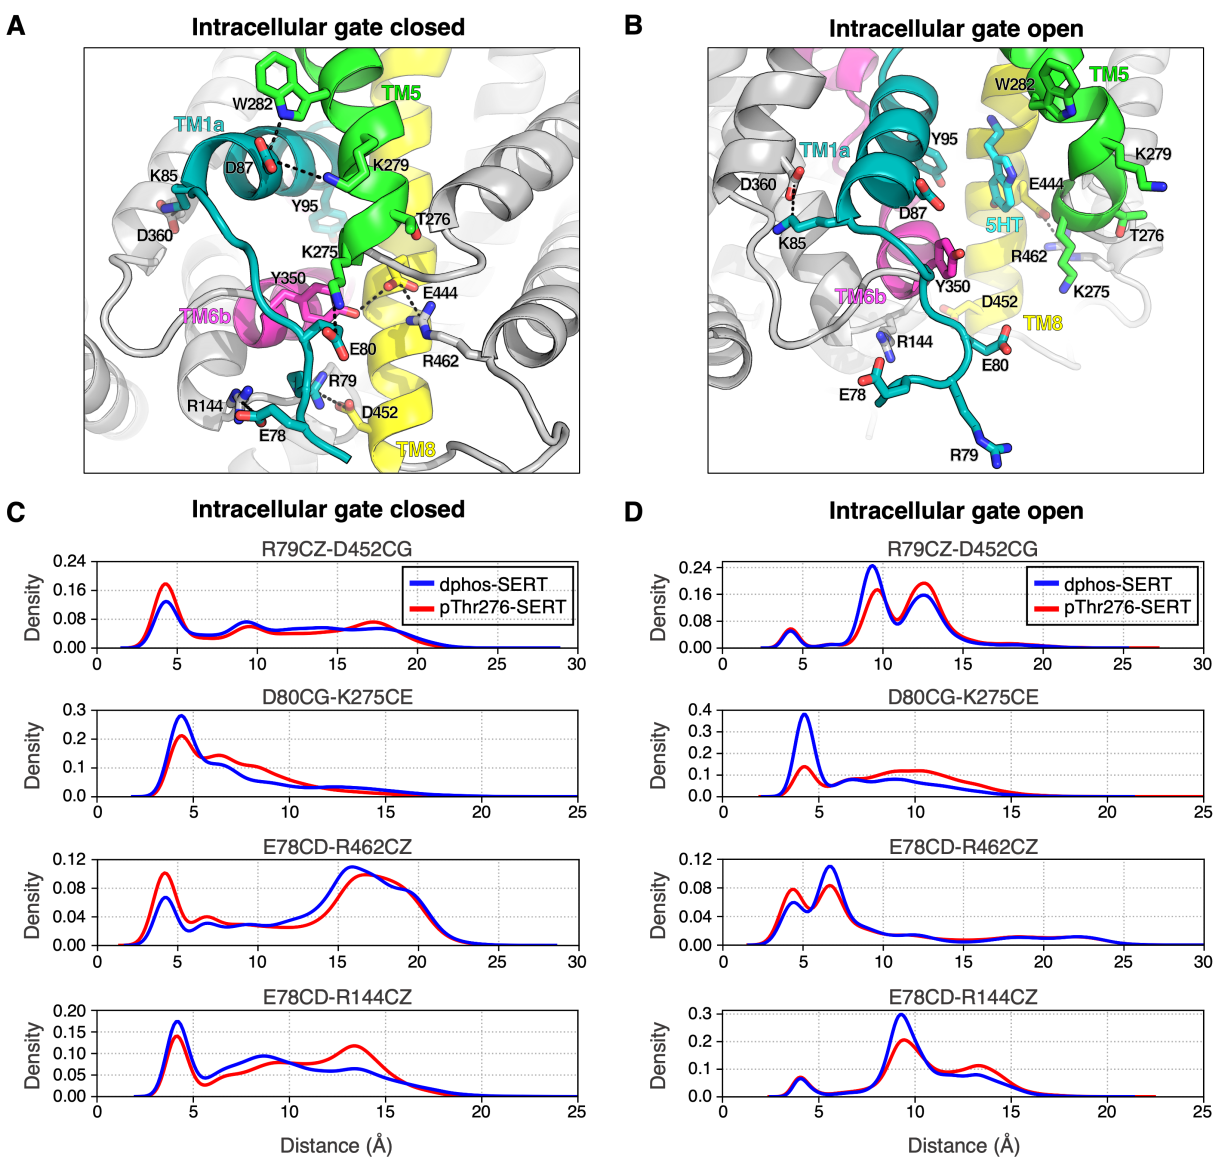

Figure 5: Rearrangement of the intracellular gating residues as a result of Thr276 phosphorylation. (A,B) MD snapshot of dphos-SERT in the occluded (A) and in the inward-facing state (B). Hydrogen bonding pairs that contribute to the closure of the intracellular exit pathway are shown in sticks. (C, D) Distance distribution of select gating residues for 50,000 MD structures for each occluded (C) and inward-facing (D) is shown. Distances calculated from the dphos-SERT MD simulations is represented in blue while pThr276-SERT in red. See Figure S2 for more distance distributions of intracellular residue pairs.

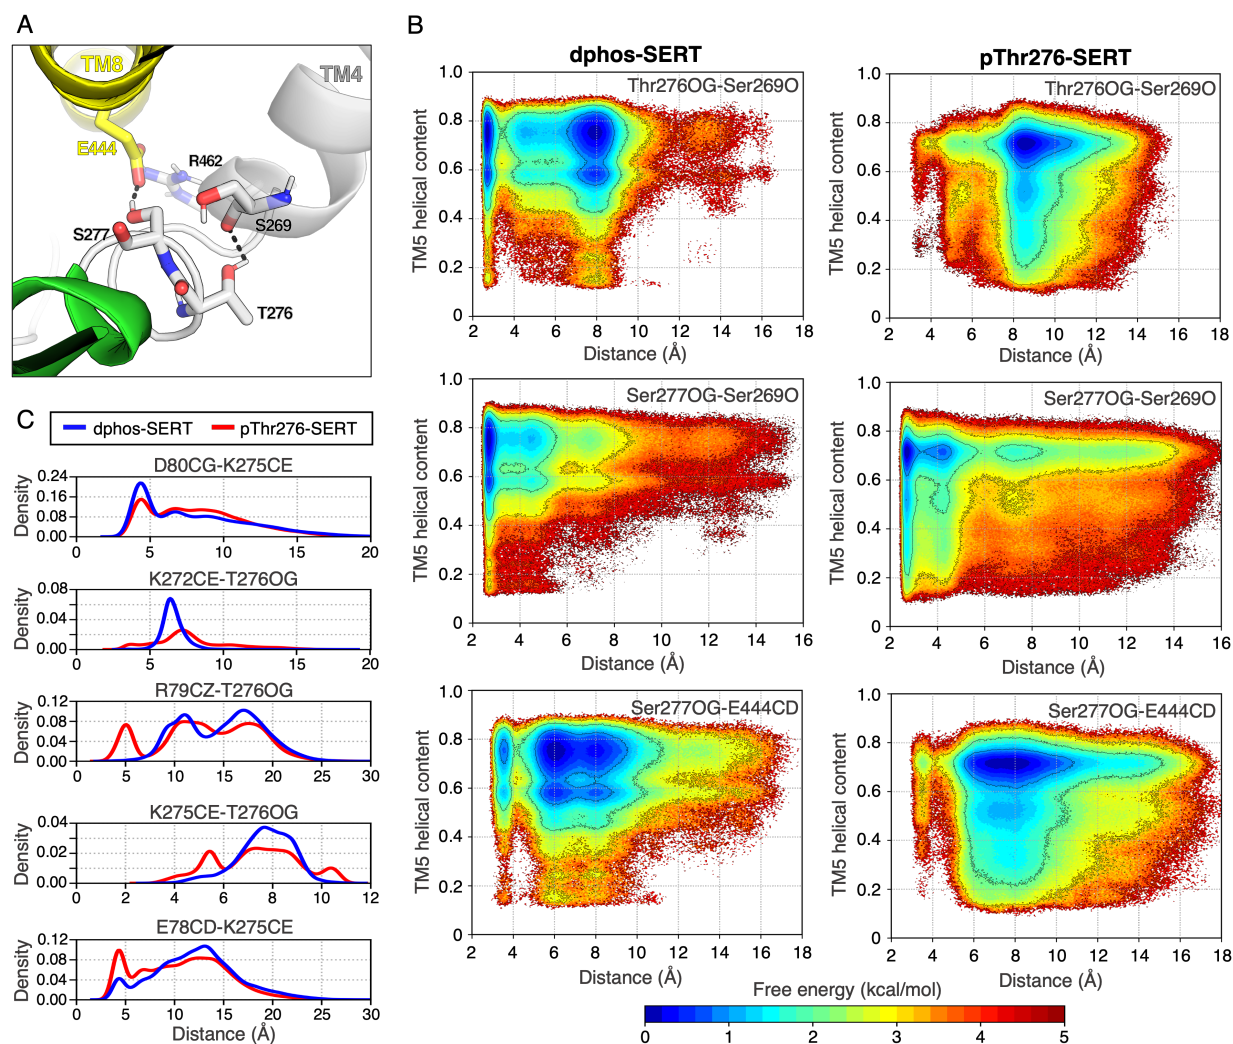

Figure 6: Thr276 phosphorylation further stabilizes the unwinding of TM5 during conformational transitions. (A) MD snapshot of the hydrogen bond arrangement to maintain the helical fold of TM5. The side chain of Thr276 interacts with the backbone carbonyl of Ser269 (TM4), while Ser277 hydrogen bonds with Glu444. (B) Free energy landscapes comparing the helical content of TM5 and hydrogen bonds identified in panel A. Helical content was measured for residues 273 to 280. Phosphorylation of Thr276 not only disrupts the hydrogen bonds formed by Ser269, but also further increases the unfolding of cytoplasmic base of TM5. (C) Shifts in the distance distribution of hydrogen bonds involving residues neighboring Thr276. Distances calculated from the dphos-SERT MSM are represented in blue while pThr276-SERT distance are in red.

180 However, in pThr276-SERT, we observed Ser277 maintains its interaction with Ser269, but  
181 not with Glu444. This hydrogen bond rearrangement in pThr276-SERT is a result of the  
182 outward bend of the pThr276 residue due to its larger and negatively charged sidechain.  
183 As a result, TM5 is unable to maintain its helical structure. Furthermore, the structural  
184 consequence of Thr276 phosphorylation results in nearby charged residues to heavily interact  
185 with the phosphate group of pThr276, thereby weakening the interactions of TM5 (Figure  
186 6C). Due to the flexible nature of the N-terminus, Arg79, which typically interacts with  
187 Asp452, forms interactions with the Thr276 phosphate group. Furthermore, the adjacent  
188 residue Lys275 may also interact with the phosphate group. These additional interactions  
189 may destabilize the intracellular gates and decrease the free energy barriers for transition to  
190 the inward-facing state.

191 Understanding the molecular regulation of neurotransmitter transporters is vital for  
192 studying normal neurological function in the brain and developing therapeutics to treat  
193 various psychiatric disorders. The observations presented in this study provide an atomistic  
194 perspective into the mechanism of regulating SERT conformational dynamics by Thr276  
195 phosphorylation. Using adaptive sampling and Markov state models to explore the SERT  
196 conformational space, we find that phosphorylated Thr276 results in the rearrangement of  
197 the intracellular hydrogen bonding network, particularly residues involving TM5. These  
198 altered interactions consequently decrease the free energy barriers for occluded to inward-  
199 facing transitions. Furthermore, inward-facing states are further stabilized to allow for sub-  
200 strate release. The results obtained in this work alongside previously conducted experimen-  
201 tal studies of Thr276 phosphorylation demonstrate how a phosphorylation event regulates  
202 SERT function through altering the conformational equilibria of outward-facing and inward-  
203 facing states. Naturally occurring coding variants in human SERT have been shown to alter  
204 transporter regulation through changes in PKG/p38 mitogen-activated protein kinase-linked  
205 pathways (47). In particular, SERT containing the allelic variant Ala56 (normally Gly56 in  
206 wild-type) is subjected to hyperphosphorylation under basal conditions (48) and suggested



207 to bias SERT in an outward-facing state (49). Additionally, the allelic variant Asn605 (nor-  
208 mally Lys605 in wild-type) has been proposed to influence SERT in a similar manner as  
209 Ala56 (49). Other identified phosphorylation sites in SERT may affect overall transporter  
210 stability, including but not limited to protein trafficking, expression, and substrate uptake  
211 (50, 51).

212 Aside from phosphorylation, other regulatory mechanisms of the NSS family have been  
213 extensively studied through computational and experimental techniques and provide a syn-  
214 ergistic approach to characterize *in vivo* transporter regulation. Sterol molecules such as  
215 cholesterol have been shown to participate in an inhibitory mechanism among these trans-  
216 porters. A cholesterol molecule wedged between TM1a, TM5, and TM7 was resolved in the  
217 crystal structure of the dopamine transporter(52). Further investigation through course  
218 grain MD simulations shows that this specific cholesterol site inhibits the outward mo-  
219 tion of TM1a, thereby locking the transporter in outward-facing states (53). Biochemi-  
220 cal and computational studies also support a similar mechanism of cholesterol inhibition in  
221 SERT (54). Phosphatidylinositol 4,5-biphosphate (PIP2)-mediated interactions with the N-  
222 terminal residues of DAT have been shown to influence transport function (55). Molecular  
223 modeling of DAT further shows the electrostatic interactions of PIP2 to promote the open-  
224 ing of the intracellular exit vestibule (56). Oligomerization of NSS transporters has been  
225 implicated in membrane trafficking and transporter regulation (57–60). Despite various  
226 biochemical and computational studies investigating the effects of oligomerization (61–63),  
227 there is no clear consensus of the oligomeric interface in the NSS family. Furthermore, how  
228 the transport function is affected by oligomerization remains unclear. As this work focused on  
229 the conformational transitions associated with the substrate import process, how phospho-  
230 rylated Thr276 affects SERT reverting back from inward-facing to outward-facing transition  
231 states remains unknown. A potential potassium binding site remains ambiguous, but it has  
232 been shown through biophysical experiments that potassium favors an inward-facing-like  
233 state (64, 65). Further studies may investigate how the altered interactions formed due



234 to phosphorylated Thr276 affect the closure of the inward-facing state and transitions to  
235 outward-facing in the presence of potassium.

## 236 **3 Methods**

### 237 **3.1 Inhibitor bound SERT simulation setup**

238 For the cocaine bound simulations, an outward facing SERT crystal structure with the  
239 sertraline bound at the orthosteric site (PDB: 6AWO) (66) was used as the starting structure  
240 for docking simulations. Thermostable mutations Ala218, Ser439, Ala554, and Ala580 were  
241 reverted to the wild type residues, Ile218, Thr439, Cys554, and Cys580, respectively. The  
242 two Na<sup>+</sup> ions and single Cl<sup>-</sup> ion that were resolved in the crystal structure were retained.  
243 The sertraline and cholesterol molecules were removed. Cocaine was then docked into the  
244 orthosteric cavity using AutoDock Vina 1.1.2 (67). PDBQT files for the outward-facing-  
245 SERT and protonated cocaine molecules were constructed using the AutoDock python utility  
246 scripts. The grid center of the orthosteric binding site was chosen based on the structural  
247 alignment of the *Drosophila* dopamine transporter complexed with cocaine (PDB: 4XP4)  
248 (68). The grid search space was chosen as a 10 Å x 10 Å x 10 Å box centered at the  
249 grid center. The default united-atom scoring function implemented in AutoDock Vina was  
250 used to obtain docked ligand configurations. When aligned with 4XP4, the RMSD of the  
251 docked cocaine molecule was 0.991 Å. The cocaine docked SERT model was then embedded  
252 in a homogeneous 1-palmitoyl-2-oleoyl-sn-glycero-3-phosphocholine (POPC) lipid bilayer,  
253 solvated with TIP3P water molecules (69). 150mM NaCl was added to neutralize the system.  
254 Terminal chains were capped with acetyl and methyl amide groups. Glu508 was modeled as  
255 the protonated form. A disulfide bridge was modeled between Cys200 and Cys209. Amber  
256 ff14SB force field (70) was used to parameterize the system. Force field parameters for  
257 cocaine were derived using the antechamber (71) module of Amber (72).

258 For ibogaine bound simulations, the inward-facing SERT cryo-EM structure complexed

259 with ibogaine (PDB: 6DZZ) (36) was used as the starting structure. The protein was em-  
260 bedded in a POPC lipid bilayer and solvated in TIP3P water molecules (69) and 150mM  
261 NaCl using CHARMM-GUI (73). Terminal residues were capped with acetyl and methyl  
262 amide groups. Glu508 was modeled as the protonated form. A disulfide bridge was modelled  
263 between Cys200 and Cys209. A Cl<sup>-</sup> and Na<sup>+</sup> ion were fitted to the Cl<sup>-</sup> and Na<sup>+</sup> site, re-  
264 spectively, based on SERT crystal structures(36). As the ibogaine parameters were derived  
265 using the CHARMM force field, we parameterized the remainder of the system using the  
266 CHARMM36m force fields (74). The CHARMM topology files were then converted to Amber  
267 format using the chamber module of the parmed program (<https://github.com/ParmEd/ParmEd>).

### 268 3.2 Inhibitor bound SERT simulation details

269 Both cocaine and ibogaine bound SERT simulations were performed using the Amber18  
270 MD package under constant NPT conditions, periodic boundary conditions, and integration  
271 timestep of 2 femtosecond. System temperature (300K) was maintained with Langevin dy-  
272 namics and a 1 picosecond<sup>-1</sup> damping coefficient. Pressure (1 atm) was maintained with the  
273 Monte Carlo barostat with an update interval every 100 steps. Bonds involving hydrogen  
274 atoms were constrained using the SHAKE algorithm (75). Electrostatics were treated with  
275 the particle mesh Ewald method(76) and a 10 Å distance cutoff was used to treat nonbonded  
276 interactions. Each system was first minimized for 20,000 steps using the conjugate gradient  
277 method and then heated to 300K while the protein was constrained. Afterwards, the un-  
278 restrained systems were equilibrated for 50 ns prior to production runs. Five independent  
279 simulation runs of 100 ns were performed using the GPU accelerated *pmemd* module of  
280 Amber18 (77).

### 281 3.3 Phosphorylated Thr276-SERT simulation on Folding@Home

282 Our previous study investigated the dynamics of 5HT import of wild-type SERT (32). These  
283 simulations consisted of 1 SERT protomer (residues 76-616) embedded in a POPC lipid bi-

284 layer, solvated with 150mM NaCl and 1 5HT molecules in TIP3P water (69). Terminal  
285 chains were capped with acetyl and methyl amide groups. Glu508 was modeled as the pro-  
286 tonated form. A disulfide bridge was modeled between Cys200 and Cys209. The simulation  
287 data previously obtained was used to construct a Markov state model (MSM).

288 The starting structures for pThr276-SERT simulations were obtained by randomly se-  
289 lecting 70 structures from 18 macrostates of wild-type SERT MSM. For each structure, 2  
290 replicates with different initial random velocities were created, totaling 2,520 independent  
291 MD simulations. Thr276 was modified to phosphothreonine using tleap. Additional Na<sup>+</sup>  
292 ions were added to the simulation box to neutralize the system. Each system was prepared  
293 using OpenMM 7.4.1 (78) and parameterized with an OpenMM ForceField using the Amber  
294 ff14SB (70) and GAFF force field (79). Simulations were performed under periodic bound-  
295 ary conditions and NPT ensemble. The mass of hydrogen atoms and connected atoms were  
296 repartitioned according to Hopkins *et al.* (80). The Langevin integrator using a timestep  
297 of 4 fs, temperature of 300K, and collision rate of  $\sqrt{2}$  ps<sup>-1</sup> was used for Langevin dynamics.  
298 Pressure (1 atm) was maintained using the Monte Carlo Membrane Barostat with an up-  
299 date frequency of 100 steps. Nonbonded forces were calculated using the particle mesh Ewald  
300 method (76) with a 10 Å distance cutoff. The resulting OpenMM system and integrator file  
301 were serialized to XML format for Folding@Home.

302 Production simulations for the 2,520 pThr276-SERT systems were conducted on Fold-  
303 ing@Home using a simulation core based on OpenMM 7.4.2 (34, 78). A maximum of 250  
304 ns was collected for each system, totaling  $\sim 630\mu\text{s}$  of aggregated simulation data. Simulation  
305 snapshots were saved every 100 ps during production runs using mixed precision.

### 306 3.4 Markov State Models

307 MSMs are a statistical approach in which the simulation data are discretized into kinetically  
308 relevant states and a transition probabilities between each state are calculated. The resulting  
309 outcome of the MSM is a kinetic model in which long timescale protein dynamics can be

310 characterized (81, 82). MSMs have been extensively employed to study protein folding,  
311 ligand binding and conformational change processes(83–86). However, there are only few  
312 examples of the application of MSMs to membrane transporter proteins(32, 33, 87–91).  
313 Here, we employ MSMs to compare the conformational ensemble of the phosphorylated and  
314 unphosphorylated SERT to obtain the thermodynamic and kinetic differences responsible  
315 for the shift in the conformational equilibrium upon phosphorylation. Finally, theoretical  
316 frameworks such as transition path theory (TPT) are used along with MSMs to identify the  
317 highest flux pathways and bottlenecks associated with the substrate transport process(92).

318 Trajectories were processed using the CPPTRAJ module of AmberTools (93) and MD-  
319 Traj Python library (94). All pThr276-SERT simulation data were used to construct a  
320 Markov state model (MSM) using the pyEMMA Python library (95). To maintain consis-  
321 tency among the wild-type SERT and phosphorylated SERT MSM, we used the same 16  
322 residue-residue pair distances along the permeation pathway and z-components of the sub-  
323 strates as described in our previous study. The number of clusters and time-independent  
324 components (tICs) were optimized by maximizing the VAMP1 score, or sum of the eigen-  
325 values of the transition matrix. The phosphorylated SERT MSM was constructed using 500  
326 clusters, 2 tICs, and a Markovian lag time of 12 ns (Figure S3). Structures extracted from  
327 MSM clusters were visualized using Visual Molecular Dynamics (VMD) (96) and PyMOL  
328 (Schrödinger, LLC). The standard error of the free energy landscapes was calculated by  
329 bootstrapping with constructing the MSM with 80% of the trajectory set randomly selected  
330 for 500 independent samples (Figure S4). The constructed MSM was further validated using  
331 the Chapman-Kolmogorov test performed on 5 macrostates (Figure S5).

## 332 **Acknowledgement**

333 This work is supported by NSF Early Career Award by NSF MCB 18-45606 to DS and R21  
334 MH113155 from NIMH to EP. This research is part of the Blue Waters sustained-petascale

335 computing project, which is supported by the National Science Foundation (awards OCI-  
336 0725070 and ACI-1238993) the State of Illinois, and as of December, 2019, the National  
337 Geospatial-Intelligence Agency. Blue Waters is a joint effort of the University of Illinois at  
338 Urbana-Champaign and its National Center for Supercomputing Applications. The authors  
339 thank Folding@Home donors for computational resources. Authors thank Zhiyu Zhao, Po-  
340 Chao Wen, and Emad Tajkhorshid from University of Illinois at Urbana-Champaign for  
341 providing parameters for protonated ibogaine.

## 342 **References**

- 343 1. Rudnick, G., Krämer, R., Blakely, R. D., Murphy, D. L., and Verrey, F. (2014) The SLC6  
344 transporters: perspectives on structure, functions, regulation, and models for transporter  
345 dysfunction. *Pflügers Archiv-European Journal of Physiology* 466, 25–42.
- 346 2. Forrest, L. R. (2015) Structural symmetry in membrane proteins. *Annual Review of*  
347 *Biophysics* 44, 311–337.
- 348 3. Mitchell, P. (1957) A general theory of membrane transport from studies of bacteria.  
349 *Nature* 180, 134–136.
- 350 4. Nelson, P. J., and Rudnick, G. (1979) Coupling between platelet 5-hydroxytryptamine  
351 and potassium transport. *J Biol Chem* 254, 10084–10089.
- 352 5. Baudry, A., Pietri, M., Launay, J.-M., Kellermann, O., and Schneider, B. (2019) Multi-  
353 faceted Regulations of the Serotonin Transporter: Impact on Antidepressant Response.  
354 *Frontiers in Neuroscience* 13.
- 355 6. Ramamoorthy, S., Shippenberg, T. S., and Jayanthi, L. D. (2011) Regulation of  
356 monoamine transporters: Role of transporter phosphorylation. *Pharmacology & ther-*  
357 *apeutics* 129, 220–238.

- 358 7. Cooper, A., Woulfe, D., and Kilic, F. (2019) Post-translational modifications of serotonin  
359 transporter. *Pharmacological Research* 140, 7–13.
- 360 8. Ozaki, N., Goldman, D., Kaye, W., Plotnicov, K., Greenberg, B., Lappalainen, J., Rud-  
361 nick, G., and Murphy, D. (2003) Serotonin transporter missense mutation associated  
362 with a complex neuropsychiatric phenotype. *Molecular psychiatry* 8, 933–936.
- 363 9. Hansen, F. H. et al. (2014) Missense dopamine transporter mutations associate with  
364 adult parkinsonism and ADHD. *Journal of Clinical Investigation* 124, 3107–3120.
- 365 10. Kitzenmaier, A., Schaefer, N., Kasaragod, V. B., Polster, T., Hantschmann, R., Schin-  
366 delin, H., and Villmann, C. (2019) The P429L loss of function mutation of the human  
367 glycine transporter 2 associated with hyperekplexia. *European Journal of Neuroscience*  
368 50, 3906–3920.
- 369 11. Prasad, H. C., Zhu, C.-B., McCauley, J. L., Samuvel, D. J., Ramamoorthy, S., Shel-  
370 ton, R. C., Hewlett, W. A., Sutcliffe, J. S., and Blakely, R. D. (2005) Human serotonin  
371 transporter variants display altered sensitivity to protein kinase G and p38 mitogen-  
372 activated protein kinase. *Proceedings of the National Academy of Sciences* 102, 11545–  
373 11550.
- 374 12. Ramamoorthy, S., Giovanetti, E., Qian, Y., and Blakely, R. D. (1998) Phosphorylation  
375 and regulation of antidepressant-sensitive serotonin transporters. *Journal of Biological*  
376 *Chemistry* 273, 2458–2466.
- 377 13. Ramamoorthy, S., and Blakely, R. D. (1999) Phosphorylation and sequestration of sero-  
378 tonin transporters differentially modulated by psychostimulants. *Science* 285, 763–766.
- 379 14. Steiner, J. A., Carneiro, A. M. D., Wright, J., Matthies, H. J., Prasad, H. C., Nicki, C. K.,  
380 Dostmann, W. R., Buchanan, C. C., Corbin, J. D., Francis, S. H., and Blakely, R. D.  
381 (2009) cGMP-dependent protein kinase Ialpha associates with the antidepressant-



- 382 sensitive serotonin transporter and dictates rapid modulation of serotonin uptake. *Molec-*  
383 *ular Brain Res* 2, 26.
- 384 15. Khoshbouei, H., Sen, N., Guptaroy, B., Johnson, L., Lund, D., Gnegy, M. E., Galli, A.,  
385 and Javitch, J. A. (2004) N-terminal phosphorylation of the dopamine transporter is  
386 required for amphetamine-induced efflux. *PLoS Biol* 2, e78.
- 387 16. Foster, J. D., Yang, J.-W., Moritz, A. E., ChallaSivaKanaka, S., Smith, M. A., Holy, M.,  
388 Wilebski, K., Sitte, H. H., and Vaughan, R. A. (2012) Dopamine transporter phosphory-  
389 lation site threonine 53 regulates substrate reuptake and amphetamine-stimulated efflux.  
390 *Journal of Biological Chemistry* 287, 29702–29712.
- 391 17. Seo, Y. A., Kumara, R., Wetli, H., and Wessling-Resnick, M. (2016) Regulation of diva-  
392 lent metal transporter-1 by serine phosphorylation. *Biochemical Journal* 473, 4243–4254.
- 393 18. Minematsu, T., and Giacomini, K. M. (2011) Interactions of Tyrosine Kinase Inhibitors  
394 with Organic Cation Transporters and Multidrug and Toxic Compound Extrusion Pro-  
395 teins. *Molecular Cancer Therapeutics* 10, 531–539.
- 396 19. Annaba, F., Sarwar, Z., Gill, R. K., Ghosh, A., Saksena, S., Borthakur, A., Hecht, G. A.,  
397 Dudeja, P. K., and Alrefai, W. A. (2012) Enteropathogenic Escherichia coli inhibits  
398 ileal sodium-dependent bile acid transporter ASBT. *American Journal of Physiology-*  
399 *Gastrointestinal and Liver Physiology* 302, G1216–G1222.
- 400 20. Sprowl, J. A. et al. (2016) A phosphotyrosine switch regulates organic cation trans-  
401 porters. *Nature Communications* 7.
- 402 21. Millar, A. H., Heazlewood, J. L., Giglione, C., Holdsworth, M. J., Bachmair, A., and  
403 Schulze, W. X. (2019) The Scope, Functions, and Dynamics of Posttranslational Protein  
404 Modifications. *Annual Review of Plant Biology* 70, 119–151.

- 405 22. Schönichen, A., Webb, B. A., Jacobson, M. P., and Barber, D. L. (2013) Considering Pro-  
406 tonation as a Posttranslational Modification Regulating Protein Structure and Function.  
407 *Annual Review of Biophysics* 42, 289–314.
- 408 23. Kuzmanic, A., Sutto, L., Saladino, G., Nebreda, A. R., Gervasio, F. L., and Orozco, M.  
409 (2017) Changes in the free-energy landscape of p38 $\alpha$  MAP kinase through its canonical  
410 activation and binding events as studied by enhanced molecular dynamics simulations.  
411 *eLife* 6.
- 412 24. Moffett, A. S., and Shukla, D. (2020) Structural Consequences of Multisite Phosphory-  
413 lation in the BAK1 Kinase Domain. *Biophysical Journal* 118, 698–707.
- 414 25. Jonniya, N. A., Sk, M. F., and Kar, P. (2019) Investigating Phosphorylation-Induced  
415 Conformational Changes in WNK1 Kinase by Molecular Dynamics Simulations. *ACS*  
416 *Omega* 4, 17404–17416.
- 417 26. Moffett, A. S., Bender, K. W., Huber, S. C., and Shukla, D. (2017) Allosteric Control of  
418 a Plant Receptor Kinase through S-Glutathionylation. *Biophysical Journal* 113, 2354–  
419 2363.
- 420 27. Shukla, S., Zhao, C., and Shukla, D. (2019) Dewetting controls plant hormone perception  
421 and initiation of drought resistance signaling. *Structure* 27, 692–702.
- 422 28. Shental-Bechor, D., and Levy, Y. (2008) Effect of glycosylation on protein folding: a close  
423 look at thermodynamic stabilization. *Proceedings of the National Academy of Sciences*  
424 105, 8256–8261.
- 425 29. Ramamoorthy, S., Samuvel, D. J., Buck, E. R., Rudnick, G., and Jayanthi, L. D. (2007)  
426 Phosphorylation of threonine residue 276 is required for acute regulation of serotonin  
427 transporter by cyclic GMP. *Journal of Biological Chemistry* 282, 11639–11647.

- 428 30. Zhang, Y.-W., Turk, B. E., and Rudnick, G. (2016) Control of serotonin transporter  
429 phosphorylation by conformational state. *Proceedings of the National Academy of Sci-*  
430 *ences* *113*, E2776–E2783.
- 431 31. Bailey, D. M., Catron, M. A., Kovtun, O., Macdonald, R. L., Zhang, Q., and Rosen-  
432 thal, S. J. (2018) Single quantum dot tracking reveals serotonin transporter diffusion  
433 dynamics are correlated with cholesterol-sensitive threonine 276 phosphorylation status  
434 in primary midbrain neurons. *ACS chemical neuroscience* *9*, 2534–2541.
- 435 32. Chan, M., Selvam, B., Young, H., Procko, E., and Shukla, D. (2020) The Substrate  
436 Import Mechanism of the Human Serotonin Transporter. *bioRxiv* doi: 10.26434/chem-  
437 rxiv.9922301.
- 438 33. Young, H. J., Chan, M., Selvam, B., Szymanski, S. K., Shukla, D., and Procko, E. (2021)  
439 Deep Mutagenesis of a Transporter for Uptake of a Non-Native Substrate Identifies  
440 Conformationally Dynamic Regions. *bioRxiv* doi: 10.1101/2021.04.19.440442.
- 441 34. Shirts, M., and Pande, V. S. (2000) Screen savers of the world unite! *Science* *290*,  
442 1903–1904.
- 443 35. Koldsø, H., Noer, P., Grouleff, J., Autzen, H. E., Sinning, S., and Schiøtt, B. (2011)  
444 Unbiased Simulations Reveal the Inward-Facing Conformation of the Human Serotonin  
445 Transporter and Na<sup>+</sup> Ion Release. *PLoS Computational Biology* *7*, e1002246.
- 446 36. Coleman, J. A., Yang, D., Zhao, Z., Wen, P.-C., Yoshioka, C., Tajkhorshid, E., and  
447 Gouaux, E. (2019) Serotonin transporter–ibogaine complexes illuminate mechanisms of  
448 inhibition and transport. *Nature* *569*, 141.
- 449 37. Zhang, Y.-W., and Rudnick, G. (2006) The cytoplasmic substrate permeation pathway  
450 of serotonin transporter. *Journal of Biological Chemistry* *281*, 36213–36220.

- 451 38. Merkle, P. S., Gotfryd, K., Cuendet, M. A., Leth-Espensen, K. Z., Gether, U.,  
452 Loland, C. J., and Rand, K. D. (2018) Substrate-modulated unwinding of transmem-  
453 brane helices in the NSS transporter LeuT. *Science Advances* 4, eaar6179.
- 454 39. Krishnamurthy, H., and Gouaux, E. (2012) X-ray structures of LeuT in substrate-free  
455 outward-open and apo inward-open states. *Nature* 481, 469–474.
- 456 40. Androutsellis-Theotokis, A., and Rudnick, G. (2002) Accessibility and conformational  
457 coupling in serotonin transporter predicted internal domains. *Journal of Neuroscience*  
458 22, 8370–8378.
- 459 41. Zhang, Y.-W., and Rudnick, G. (2005) Cysteine-scanning mutagenesis of serotonin trans-  
460 porter intracellular loop 2 suggests an  $\alpha$ -helical conformation. *Journal of Biological*  
461 *Chemistry* 280, 30807–30813.
- 462 42. Jacobs, M. T., Zhang, Y.-W., Campbell, S. D., and Rudnick, G. (2007) Ibogaine, a  
463 noncompetitive inhibitor of serotonin transport, acts by stabilizing the cytoplasm-facing  
464 state of the transporter. *Journal of Biological Chemistry* 282, 29441–29447.
- 465 43. Zhang, Y.-W., Tavoulari, S., Sinning, S., Aleksandrova, A. A., Forrest, L. R., and Rud-  
466 nick, G. (2018) Structural elements required for coupling ion and substrate transport in  
467 the neurotransmitter transporter homolog LeuT. *Proceedings of the National Academy*  
468 *of Sciences* 115, E8854–E8862.
- 469 44. Zhao, Y., Terry, D. S., Shi, L., Quick, M., Weinstein, H., Blanchard, S. C., and Jav-  
470 itch, J. A. (2011) Substrate-modulated gating dynamics in a Na<sup>+</sup>-coupled neurotrans-  
471 mitter transporter homologue. *Nature* 474, 109–113.
- 472 45. Cheng, M. H., and Bahar, I. (2015) Molecular mechanism of dopamine transport by  
473 human dopamine transporter. *Structure* 23, 2171–2181.

- 474 46. Dehnes, Y., Shan, J., Beuming, T., Shi, L., Weinstein, H., and Javitch, J. A. (2014) Con-  
475 formational changes in dopamine transporter intracellular regions upon cocaine binding  
476 and dopamine translocation. *Neurochemistry international* 73, 4–15.
- 477 47. Prasad, H. C., Zhu, C.-B., McCauley, J. L., Samuvel, D. J., Ramamoorthy, S., Shel-  
478 ton, R. C., Hewlett, W. A., Sutcliffe, J. S., and Blakely, R. D. (2005) Human serotonin  
479 transporter variants display altered sensitivity to protein kinase G and p38 mitogen-  
480 activated protein kinase. *Proceedings of the National Academy of Sciences* 102, 11545–  
481 11550.
- 482 48. Veenstra-VanderWeele, J. et al. (2012) Autism gene variant causes hyperserotonemia,  
483 serotonin receptor hypersensitivity, social impairment and repetitive behavior. *Proceed-*  
484 *ings of the National Academy of Sciences* 109, 5469–5474.
- 485 49. Quinlan, M. A., Krout, D., Katamish, R. M., Robson, M. J., Nettesheim, C.,  
486 Gresch, P. J., Mash, D. C., Henry, L. K., and Blakely, R. D. (2019) Human Sero-  
487 tonin Transporter Coding Variation Establishes Conformational Bias with Functional  
488 Consequences. *ACS Chemical Neuroscience* 10, 3249–3260.
- 489 50. Annamalai, B., Mannangatti, P., Arapulisamy, O., Shippenberg, T. S., Jayanthi, L. D.,  
490 and Ramamoorthy, S. (2011) Tyrosine Phosphorylation of the Human Serotonin Trans-  
491 porter: A Role in the Transporter Stability and Function. *Molecular Pharmacology* 81,  
492 73–85.
- 493 51. Sørensen, L., Strømgaard, K., and Kristensen, A. S. (2014) Characterization of Intra-  
494 cellular Regions in the Human Serotonin Transporter for Phosphorylation Sites. *ACS*  
495 *Chemical Biology* 9, 935–944.
- 496 52. Penmatsa, A., Wang, K. H., and Gouaux, E. (2013) X-ray structure of dopamine trans-  
497 porter elucidates antidepressant mechanism. *Nature* 503, 85–90.

- 498 53. Zeppelin, T., Ladefoged, L. K., Sinning, S., Periole, X., and Schiøtt, B. (2018) A di-  
499 rect interaction of cholesterol with the dopamine transporter prevents its out-to-inward  
500 transition. *PLoS computational biology* *14*, e1005907.
- 501 54. Laursen, L., Severinsen, K., Kristensen, K. B., Periole, X., Overby, M., Müller, H. K.,  
502 Schiøtt, B., and Sinning, S. (2018) Cholesterol binding to a conserved site modulates the  
503 conformation, pharmacology, and transport kinetics of the human serotonin transporter.  
504 *Journal of Biological Chemistry* *293*, 3510–3523.
- 505 55. Hamilton, P. J., Belovich, A. N., Khelashvili, G., Saunders, C., Erreger, K., Javitch, J. A.,  
506 Sitte, H. H., Weinstein, H., Matthies, H. J., and Galli, A. (2014) PIP 2 regulates psychos-  
507 timulant behaviors through its interaction with a membrane protein. *Nature chemical*  
508 *biology* *10*, 582–589.
- 509 56. Khelashvili, G., Stanley, N., Sahai, M. A., Medina, J., LeVine, M. V., Shi, L., De Fab-  
510 ritiis, G., and Weinstein, H. (2015) Spontaneous inward opening of the dopamine trans-  
511 porter is triggered by PIP2-regulated dynamics of the N-terminus. *ACS chemical neu-*  
512 *roscience* *6*, 1825–1837.
- 513 57. Bartholomäus, I., Milan-Lobo, L., Nicke, A., Dutertre, S., Hastrup, H., Jha, A.,  
514 Gether, U., Sitte, H. H., Betz, H., and Eulenburg, V. (2008) Glycine transporter dimers:  
515 evidence for occurrence in the plasma membrane. *Journal of Biological Chemistry* *283*,  
516 10978–10991.
- 517 58. Scholze, P., Freissmuth, M., and Sitte, H. H. (2002) Mutations within an intramembrane  
518 leucine heptad repeat disrupt oligomer formation of the rat GABA transporter 1. *Journal*  
519 *of Biological Chemistry* *277*, 43682–43690.
- 520 59. Sitte, H. H., Farhan, H., and Javitch, J. A. (2004) Sodium-dependent neurotransmitter  
521 transporters: oligomerization as a determinant of transporter function and trafficking.  
522 *Molecular interventions* *4*, 38.



- 523 60. Anderluh, A., Klotzsch, E., Reismann, A. W., Brameshuber, M., Kudlacek, O., New-  
524 man, A. H., Sitte, H. H., and Schütz, G. J. (2014) Single molecule analysis reveals coex-  
525 istence of stable serotonin transporter monomers and oligomers in the live cell plasma  
526 membrane. *Journal of Biological Chemistry* 289, 4387–4394.
- 527 61. Cheng, M. H., Garcia-Olivares, J., Wasserman, S., DiPietro, J., and Bahar, I. (2017) Al-  
528 losteric modulation of human dopamine transporter activity under conditions promoting  
529 its dimerization. *Journal of Biological Chemistry* 292, 12471–12482.
- 530 62. Periole, X., Zeppelin, T., and Schiøtt, B. (2018) Dimer interface of the human serotonin  
531 transporter and effect of the membrane composition. *Scientific reports* 8, 1–15.
- 532 63. Jayaraman, K., Morley, A. N., Szöllösi, D., Wassenaar, T. A., Sitte, H. H., and Stock-  
533 ner, T. (2018) Dopamine transporter oligomerization involves the scaffold domain, but  
534 spares the bundle domain. *PLoS computational biology* 14, e1006229.
- 535 64. Möller, I. R., Slivacka, M., Nielsen, A. K., Rasmussen, S. G., Gether, U., Loland, C. J.,  
536 and Rand, K. D. (2019) Conformational dynamics of the human serotonin transporter  
537 during substrate and drug binding. *Nature communications* 10, 1–13.
- 538 65. Billesbølle, C. B., Mortensen, J. S., Sohail, A., Schmidt, S. G., Shi, L., Sitte, H. H.,  
539 Gether, U., and Loland, C. J. (2016) Transition metal ion FRET uncovers K<sup>+</sup> regulation  
540 of a neurotransmitter/sodium symporter. *Nature communications* 7, 1–12.
- 541 66. Coleman, J. A., and Gouaux, E. (2018) Structural basis for recognition of diverse an-  
542 tidepressants by the human serotonin transporter. *Nature structural & molecular biology*  
543 25, 170–175.
- 544 67. Trott, O., and Olson, A. J. (2010) AutoDock Vina: improving the speed and accuracy of  
545 docking with a new scoring function, efficient optimization, and multithreading. *Journal*  
546 *of computational chemistry* 31, 455–461.

- 547 68. Wang, K. H., Penmatsa, A., and Gouaux, E. (2015) Neurotransmitter and psychostim-  
548 ulant recognition by the dopamine transporter. *Nature* 521, 322–327.
- 549 69. Jorgensen, W. L., Chandrasekhar, J., Madura, J. D., Impey, R. W., and Klein, M. L.  
550 (1983) Comparison of simple potential functions for simulating liquid water. *The Journal*  
551 *of chemical physics* 79, 926–935.
- 552 70. Maier, J. A., Martinez, C., Kasavajhala, K., Wickstrom, L., Hauser, K. E., and Sim-  
553 merling, C. (2015) ff14SB: improving the accuracy of protein side chain and backbone  
554 parameters from ff99SB. *Journal of chemical theory and computation* 11, 3696–3713.
- 555 71. Wang, J., Wang, W., Kollman, P. A., and Case, D. A. (2006) Automatic atom type  
556 and bond type perception in molecular mechanical calculations. *Journal of molecular*  
557 *graphics and modelling* 25, 247–260.
- 558 72. Case, D. A. et al. (2018) AMBER 2018. *University of California, San Francisco*
- 559 73. Jo, S., Kim, T., Iyer, V. G., and Im, W. (2008) CHARMM-GUI: a web-based graphical  
560 user interface for CHARMM. *Journal of computational chemistry* 29, 1859–1865.
- 561 74. Huang, J., Rauscher, S., Nawrocki, G., Ran, T., Feig, M., de Groot, B. L.,  
562 Grubmüller, H., and MacKerell, A. D. (2017) CHARMM36m: an improved force field  
563 for folded and intrinsically disordered proteins. *Nature methods* 14, 71–73.
- 564 75. Krutler, V., Gunsteren, W. F. v., and Hnenberger, P. H. (2001) A fast SHAKE algo-  
565 rithm to solve distance constraint equations for small molecules in molecular dynamics  
566 simulations. *Journal of Computational Chemistry* 22, 501–508.
- 567 76. York, D. M., Darden, T. A., and Pedersen, L. G. (1993) The effect of longrange elec-  
568 trostatic interactions in simulations of macromolecular crystals: A comparison of the  
569 Ewald and truncated list methods. *The Journal of Chemical Physics* 99, 8345–8348.

- 570 77. Lee, T.-S., Cerutti, D. S., Mermelstein, D., Lin, C., LeGrand, S., Giese, T. J., Roit-  
571 berg, A., Case, D. A., Walker, R. C., and York, D. M. (2018) GPU-accelerated molecu-  
572 lar dynamics and free energy methods in Amber18: performance enhancements and new  
573 features. *Journal of chemical information and modeling* 58, 2043–2050.
- 574 78. Eastman, P., Swails, J., Chodera, J. D., McGibbon, R. T., Zhao, Y., Beauchamp, K. A.,  
575 Wang, L.-P., Simmonett, A. C., Harrigan, M. P., Stern, C. D., Wiewiora, R. P.,  
576 Brooks, B. R., and Pande, V. S. (2017) OpenMM 7: Rapid development of high perfor-  
577 mance algorithms for molecular dynamics. *PLOS Computational Biology* 13, e1005659.
- 578 79. Wang, J., Wolf, R. M., Caldwell, J. W., Kollman, P. A., and Case, D. A. (2004) Devel-  
579 opment and testing of a general amber force field. *Journal of computational chemistry*  
580 25, 1157–1174.
- 581 80. Hopkins, C. W., Le Grand, S., Walker, R. C., and Roitberg, A. E. (2015) Long-time-step  
582 molecular dynamics through hydrogen mass repartitioning. *Journal of chemical theory*  
583 *and computation* 11, 1864–1874.
- 584 81. Husic, B. E., and Pande, V. S. (2018) Markov state models: From an art to a science.  
585 *Journal of the American Chemical Society* 140, 2386–2396.
- 586 82. Shukla, D., Hernández, C. X., Weber, J. K., and Pande, V. S. (2015) Markov State  
587 Models Provide Insights into Dynamic Modulation of Protein Function. 48, 414–422.
- 588 83. Chodera, J. D., and Noé, F. (2014) Markov state models of biomolecular conformational  
589 dynamics. 25, 135–144.
- 590 84. Gu, S., Silva, D.-A., Meng, L., Yue, A., and Huang, X. (2014) Quantitatively Character-  
591 izing the Ligand Binding Mechanisms of Choline Binding Protein Using Markov State  
592 Model Analysis. 10, e1003767.

- 593 85. Zimmerman, M. I. et al. (2021) SARS-CoV-2 simulations go exascale to predict dramatic  
594 spike opening and cryptic pockets across the proteome. *Nature Chemistry* 13, 651–659.
- 595 86. Moffett, A. S., and Shukla, D. (2018) Using molecular simulation to explore the nanoscale  
596 dynamics of the plant kinome. *Biochemical Journal* 475, 905–921.
- 597 87. Selvam, B., Mittal, S., and Shukla, D. (2018) Free Energy Landscape of the Complete  
598 Transport Cycle in a Key Bacterial Transporter. *ACS Central Science* 4, 1146–1154.
- 599 88. Selvam, B., Yu, Y.-C., Chen, L.-Q., and Shukla, D. (2019) Molecular Basis of the Glucose  
600 Transport Mechanism in Plants. *ACS Central Science* 5, 1085–1096.
- 601 89. Cheng, K. J., Selvam, B., Chen, L.-Q., and Shukla, D. (2019) Distinct substrate trans-  
602 port mechanism identified in homologous sugar transporters. *The Journal of Physical*  
603 *Chemistry B* 123, 8411–8418.
- 604 90. Feng, J., Selvam, B., and Shukla, D. (2021) How do antiporters exchange substrates  
605 across the cell membrane? An atomic-level description of the complete exchange cycle  
606 in NarK. *29*, 922–933.e3.
- 607 91. Chan, M. C., and Shukla, D. (2021) Markov state modeling of membrane transport  
608 proteins. *Journal of Structural Biology* 213, 107800.
- 609 92. Meng, Y., Shukla, D., Pande, V. S., and Roux, B. (2016) Transition path theory analysis  
610 of c-Src kinase activation. *113*, 9193–9198.
- 611 93. Roe, D. R., and Cheatham, T. E. (2013) PTRAJ and CPPTRAJ: Software for Processing  
612 and Analysis of Molecular Dynamics Trajectory Data. *Journal of Chemical Theory and*  
613 *Computation* 9, 3084–3095.
- 614 94. McGibbon, R., Beauchamp, K., Harrigan, M., Klein, C., Swails, J., Hernandez, C.,  
615 Schwantes, C., Wang, L.-P., Lane, T., and Pande, V. (2015) MDTraj: A Modern Open

616 Library for the Analysis of Molecular Dynamics Trajectories. *Biophysical Journal* 109,  
617 1528–1532.

618 95. Scherer, M. K., Trendelkamp-Schroer, B., Paul, F., Prez-Hernandez, G., Hoffmann, M.,  
619 Plattner, N., Wehmeyer, C., Prinz, J.-H., and No, F. (2015) PyEMMA 2: A Software  
620 Package for Estimation, Validation, and Analysis of Markov Models. *Journal of Chemical*  
621 *Theory and Computation* 11, 5525–5542.

622 96. Humphrey, W., Dalke, A., and Schulten, K. (1996) VMD: Visual molecular dynamics.  
623 *Journal of Molecular Graphics* 14, 33–38.
